# Supplementary material
Source: Springer Nature journal article supplement (https://www.springermedizin.de/resource/supplementary/12874_2011_816_MOESM3_ESM.pdf/9432934)

**Gamma: Predictions using formula (1)**

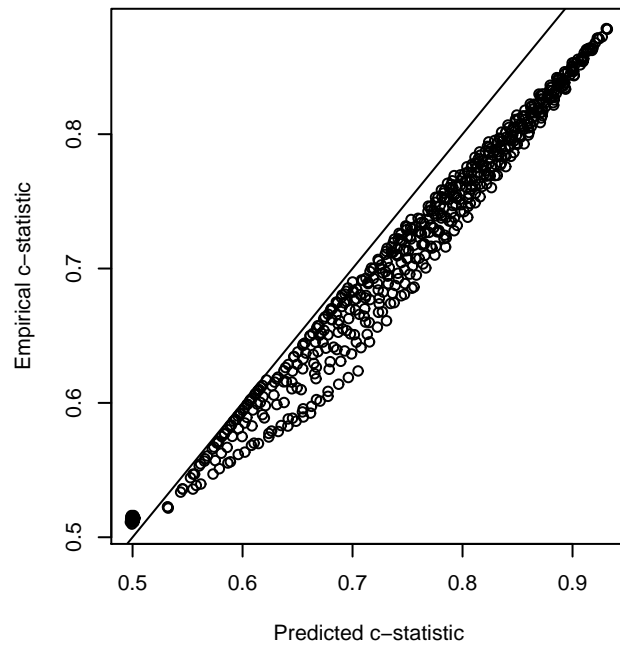

**uniform: Predictions using formula (1)**

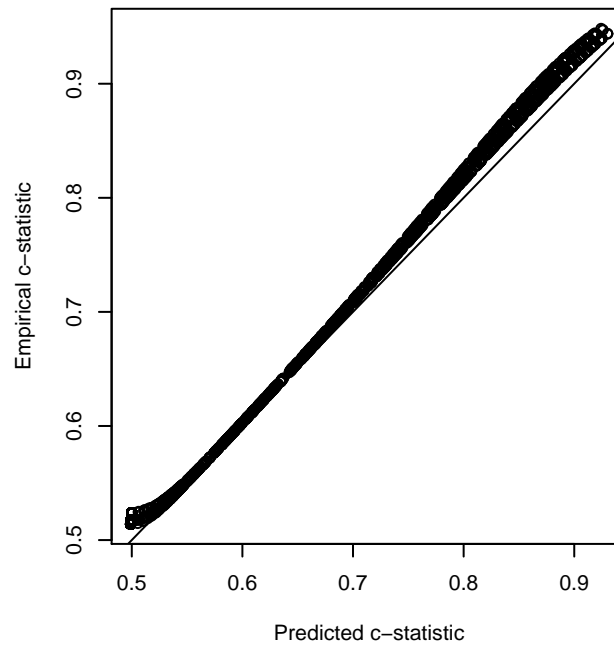

**Lognormal: Predictions using formula (1)**

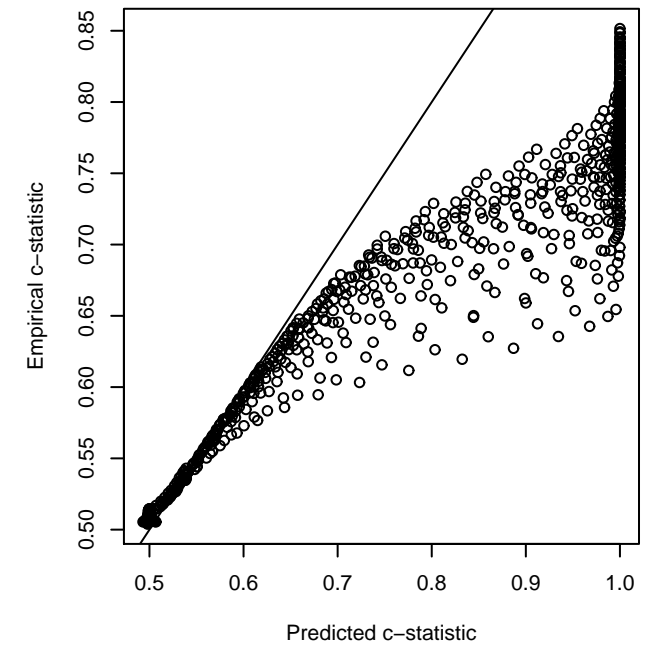

**Gamma: Predictions using formula (2)**

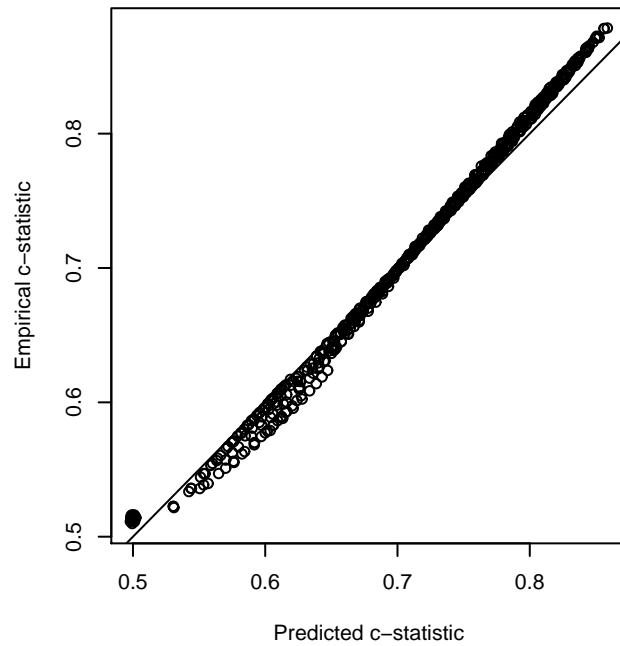

**uniform: Predictions using formula (2)**

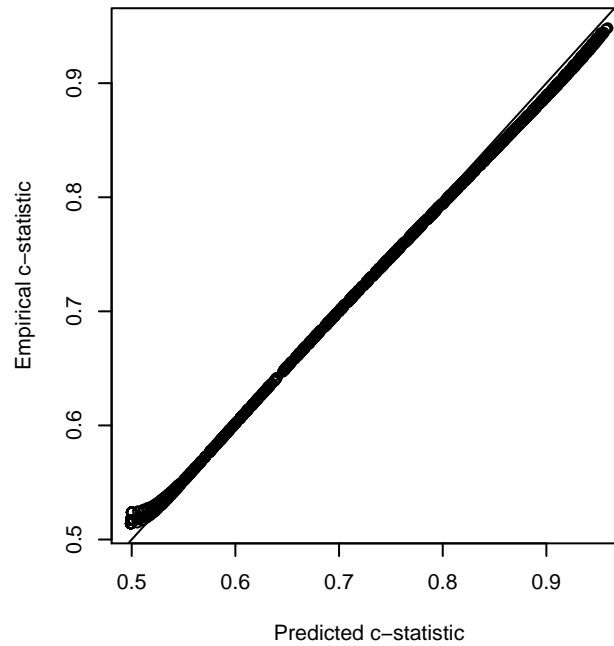

**Lognormal: Predictions using formula (2)**

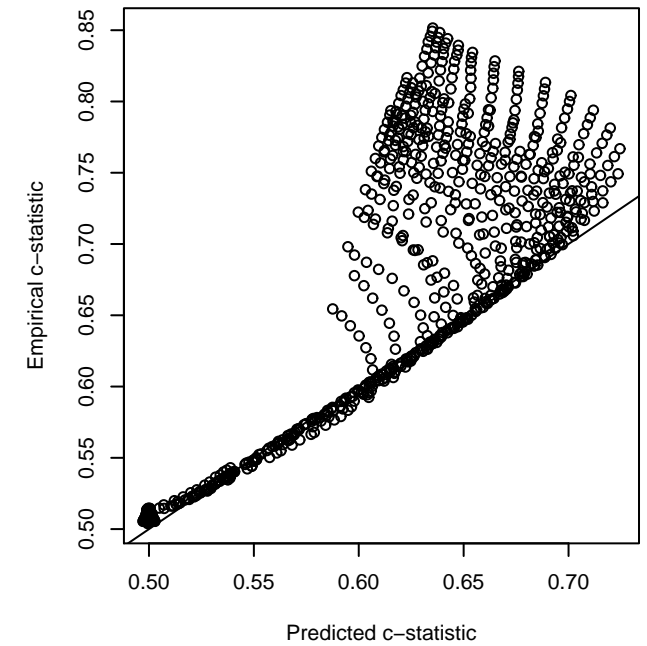

Supplement: MOESM3 [file 9432934]
